# Supplementary material
Source: Springer Nature journal article supplement (https://www.springermedizin.de/resource/supplementary/13058_2012_3237_MOESM1_ESM.pdf/9703586)

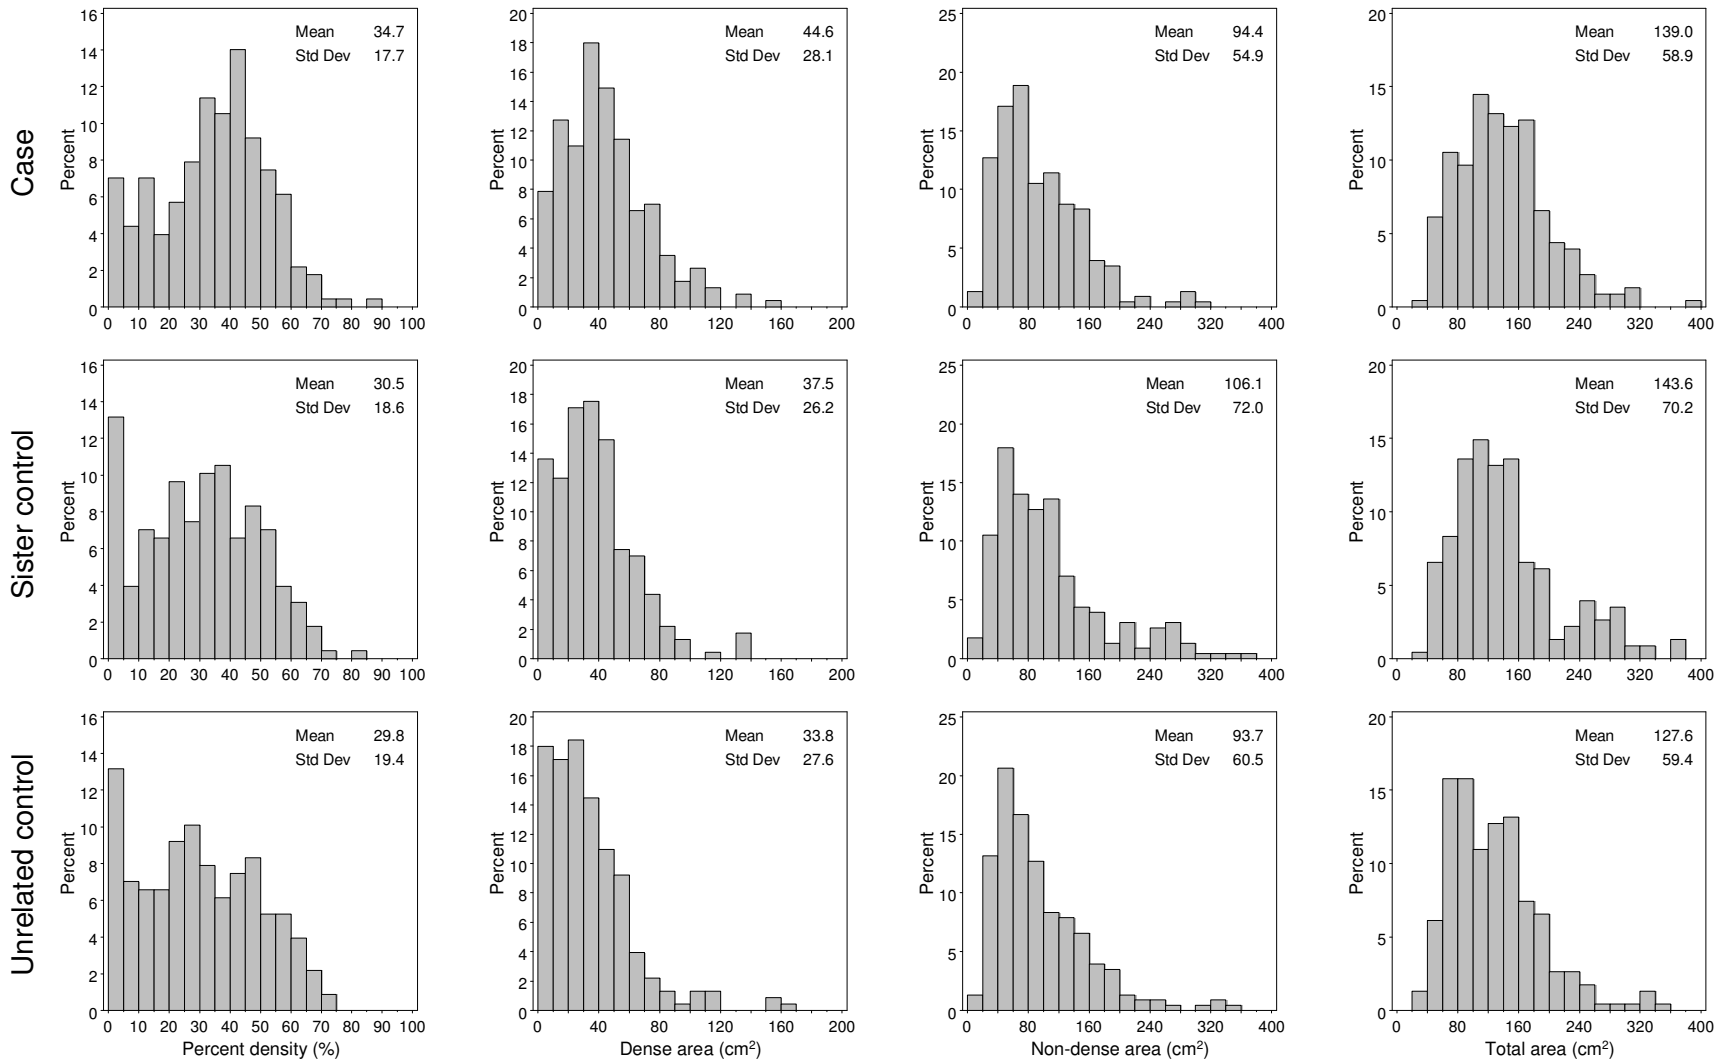

|                | Mean (STD)  | P-value | Mean (STD)   | P-value | Mean (STD)     | P-value | Mean (STD)    | P-value |
|----------------|-------------|---------|--------------|---------|----------------|---------|---------------|---------|
| Case—sister    | 4.20 (20.0) | 0.002   | 7.14 (31.6)  | 0.0008  | - 11.64 (70.8) | 0.01    | - 4.51 (70.6) | 0.34    |
| Case—unrelated | 4.87 (25.7) | 0.005   | 10.80 (36.5) | <.0001  | 0.67 (81.4)    | 0.90    | 11.48 (80.3)  | 0.03    |

Supplement: MOESM1 [file 9703586]
